# Supplementary material for: Standardised proformas improve patient handover: Audit of trauma handover practice
Source: Springer Nature journal article supplement (doi:10.1186/1754-9493-2-24), 2008-09-25
Supplement: Additional file 1 [file 1754-9493-2-24-s1.doc]

**APPENDIX 1** HANDOVER SHEET

| REF BY | PATIENT INFORMATION | DIAGNOSIS | OUTSTANDING JOBS / RESULTS |
| --- | --- | --- | --- |
| A&E   GP   #CL   TRA   WD  | AFFIX LABEL HERE | L  R  BILAT  | CLERK   BLOODS   XRAY   CHECK XRAY   CON. & MRK   TH. CARD   REG RV  |
| WARD |
| A&E   GP   #CL   TRA   WD  | AFFIX LABEL HERE | L  R  BILAT  | CLERK   BLOODS   XRAY   CHECK XRAY   CON. & MRK   TH. CARD   REG RV  |
| WARD |
| A&E   GP   #CL   TRA   WD  | AFFIX LABEL HERE | L  R  BILAT  | CLERK   BLOODS   XRAY   CHECK XRAY   CON. & MRK   TH. CARD   REG RV  |
| WARD |
| A&E   GP   #CL   TRA   WD  | AFFIX LABEL HERE | L  R  BILAT  | CLERK   BLOODS   XRAY   CHECK XRAY   CON. & MRK   TH. CARD   REG RV  |
| WARD |
| A&E   GP   #CL   TRA   WD  | AFFIX LABEL HERE | L  R  BILAT  | CLERK   BLOODS   XRAY   CHECK XRAY   CON. & MRK   TH. CARD   REG RV  |
| WARD |
| A&E   GP   #CL   TRA   WD  | AFFIX LABEL HERE | L  R  BILAT  | CLERK   BLOODS   XRAY   CHECK XRAY   CON. & MRK   TH. CARD   REG RV  |
| WARD |

CONSULTANT ON CALL_____________ DATE_____________
